# Supplementary material
Source: Springer Nature journal article supplement (https://www.springermedizin.de/resource/supplementary/12967_2013_1855_MOESM6_ESM.pdf/9574928)

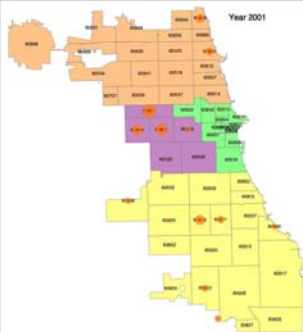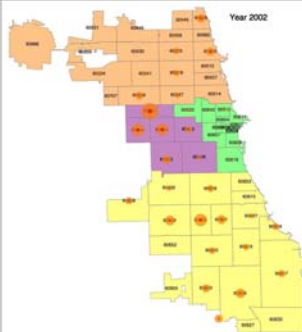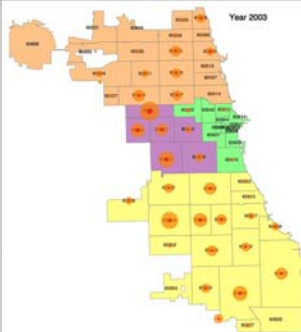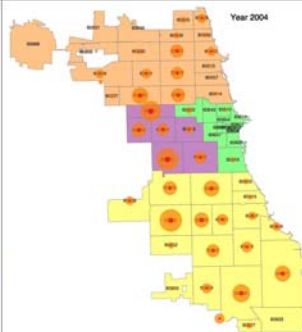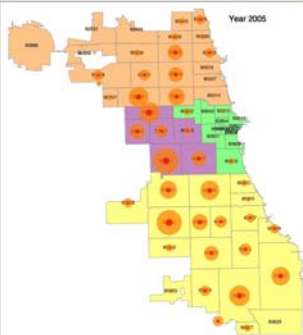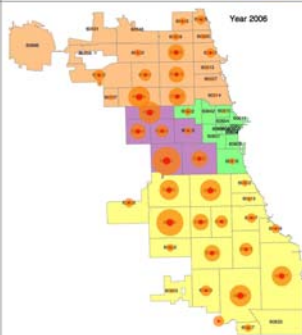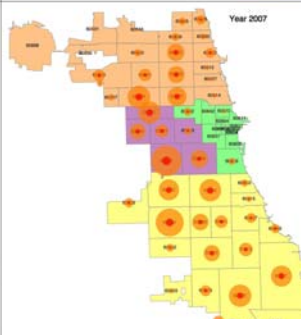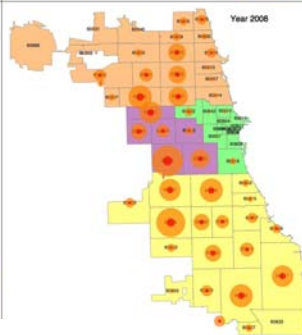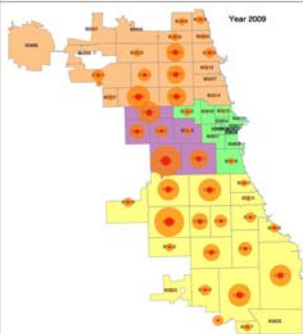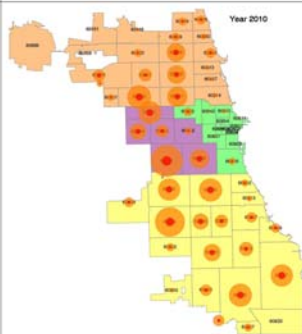

- North Side
- West Side
- Central
- South Side

Supplement: MOESM6 [file 9574928]
